# Supplementary material for: Psychometric properties of the PROMIS-57 questionnaire, Norwegian version
Source: Springer Nature journal article supplement (doi:10.1007/s11136-021-02906-1), 2021-06-18
Supplement: MOESM1 [file 11136_2021_2906_moesm1_esm.pdf]

## Online appendix - supplementary material to

Psychometric properties of the of PROMIS-57 questionnaire, Norwegian version.

Authors: Stein Arne Rimehaug, Aaron J Kaat, Jan Egil Nordvik, Mari Klokkeud, Hilde Stendal Robinson

Submitted to Quality of Life Research, September 2020, revised March 2021

1. Supplementary Section S1 – Consent statement
2. Supplementary Section S2 – Example T-score conversion table
3. Supplementary Figure S1 – Raw score histograms
4. Supplementary Figure S2 – IRT Item Characteristic plots (ICC)
5. Supplementary Table S1 – IRT parameters for the Norwegian calibrations
6. Supplementary Table S2 – Alternative IRT model fit indices
7. Supplementary Table S3: Local independence output

### 1. Supplementary Section S1: Consent statement for online respondents **Utprøving av et nytt skjema for egenrapportert helse (In Norwegian)**

Regional kompetansetjeneste for rehabilitering, Helse Sør-Øst, ber nå personer med og uten alvorlige helsetilstander, om å delta i utprøvingen av et nytt, internasjonalt måleskjema for egenrapportert helse. Undersøkelsen er anonym, og de som ønsker å delta, samtykker til deltakelse ved å gjennomføre og sende inn undersøkelsen. Resultatene vil både kunne bli benyttet i forbedringsarbeid i helsetjenesten og til forskning. Ingen besvarelser vil kunne spores tilbake til enkeltpersoner, og vil dermed heller ikke kunne kobles mot andre helsedata eller persondata.

I undersøkelsen vil man oppleve at flere spørsmål er like. Dette skyldes at vi her sammenligner et nytt skjema med et annet. Vi ber derfor om tålmodighet til å besvare hele undersøkelsen, som består av rundt 100 spørsmål, og tar mellom 15-20 minutter å fullføre i sin helhet. Det er viktig at du gjennomfører hele undersøkelsen, om du ønsker å delta.

Vi ber om at du deltar med kun 1 besvarelse. Ønsker du det, kan lenken til undersøkelsen deles med andre. Siden dette er en anonym undersøkelse, bruker alle som gjennomfører undersøkelsen den samme nettløsen. Resultatet fra undersøkelsen vil bli oppsummert og gjort tilgjengelig på våre websider ([www.sunnaas.no/rkr](http://www.sunnaas.no/rkr)) i tillegg til publisering i internasjonale tidsskrift.

### 2. Supplementary Section S2: T-score online scoring method

Preferred method for scoring multiple individuals: Assessment center online scoring service at [https://www.assessmentcenter.net/ac\\_scoring-service](https://www.assessmentcenter.net/ac_scoring-service)

Upload .csv file with multiple assessments and receive accurate IRT theta.

T-score and Standard Error of measurement for each individual score by e-mail from AssessmentCenter.

Outside of the USA, make sure the .csv file is comma separated, and with periods for decimals, and later use the text-to-column function in Excel (or import functions in your statistics software like R or SPSS) to re-convert output files.

Alternatively, look up subscore conversion with the help of look-up tables and the PROMIS\_Adult\_Profile\_Scoring\_Manual.pdf found at [www.healthmeasures.net](http://www.healthmeasures.net)

Refer to the resources for interpretation of scores at <http://www.healthmeasures.net/score-and-interpret/>

### 3. Supplementary Figure S1 – HISTOGRAMS of PROMIS-57 SCORE distributions

**PROMIS PF8 Raw score Norway**

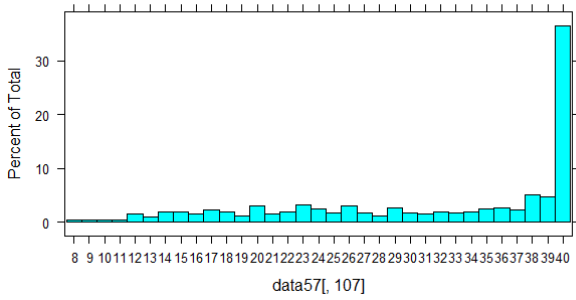

**PROMIS ANX8 Raw score Norway**

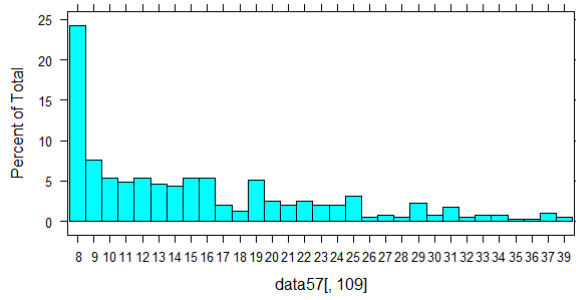

**PROMIS DEP8 Raw score Norway**

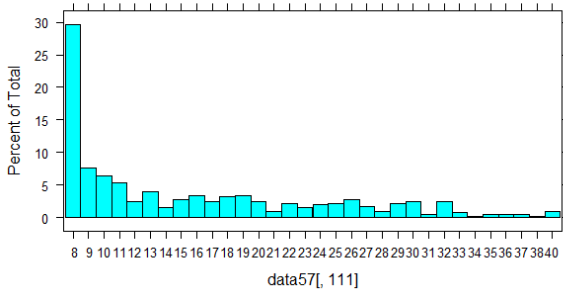

**PROMIS FAT8 Raw score Norway**

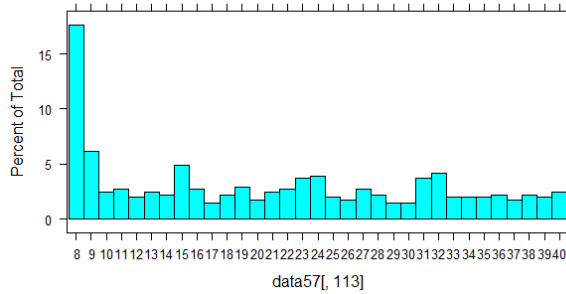

**PROMIS SLP8 Raw score Norway**

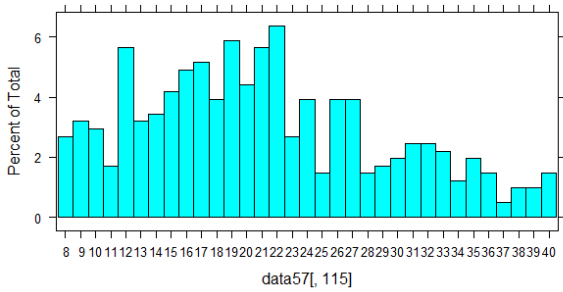

**PROMIS SOC8 Raw score Norway**

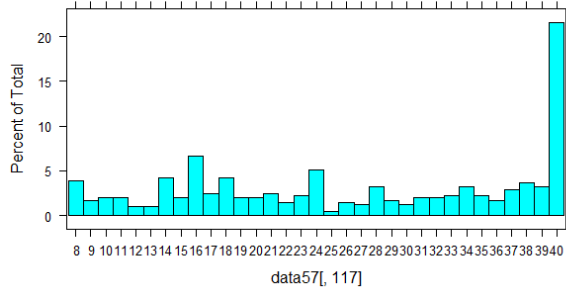

**PROMIS PAIN8 Raw score Norway**

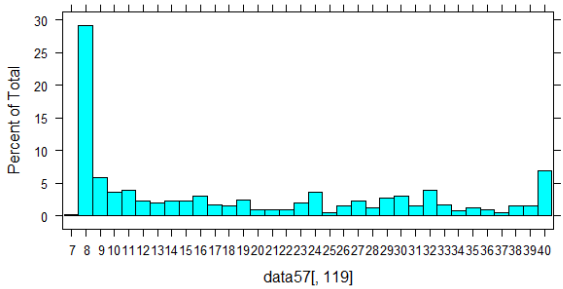

**PROMIS57 PAIN Numeric rating Norway**

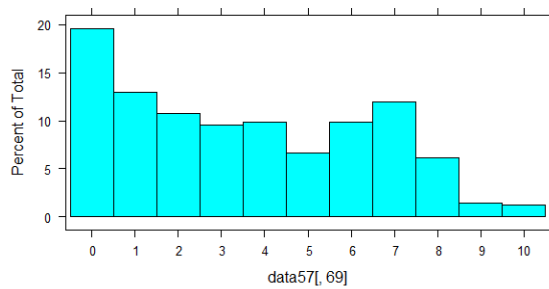

**PROMIS PF8 Raw score Norway**

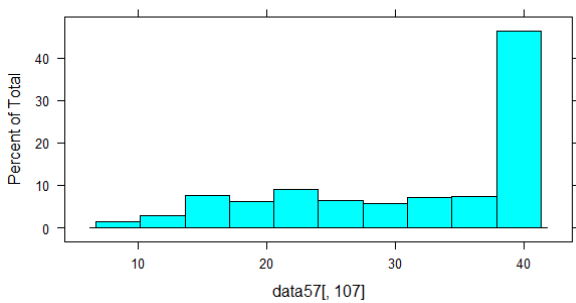

**PROMIS ANX8 Raw score Norway**

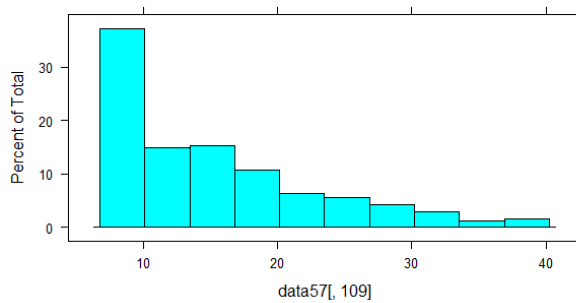

**PROMIS DEP8 Raw score Norway**

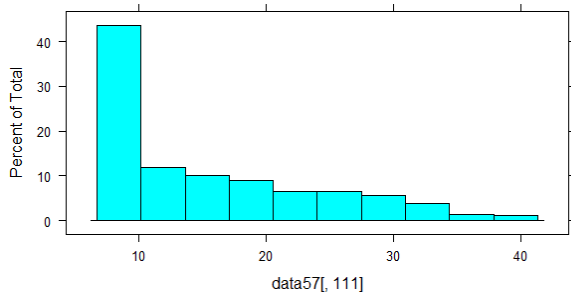

**PROMIS FAT8 Raw score Norway**

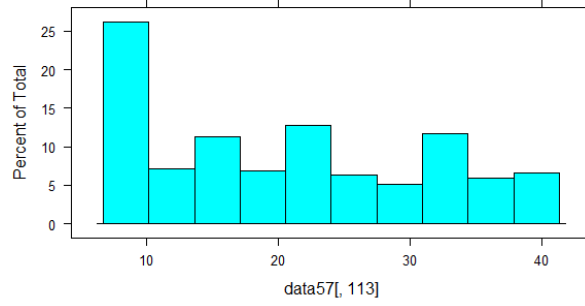

**PROMIS SLP8 T-score Norway**

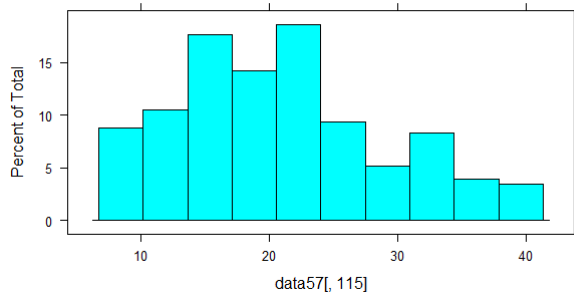

**PROMIS SOC8 Raw score Norway**

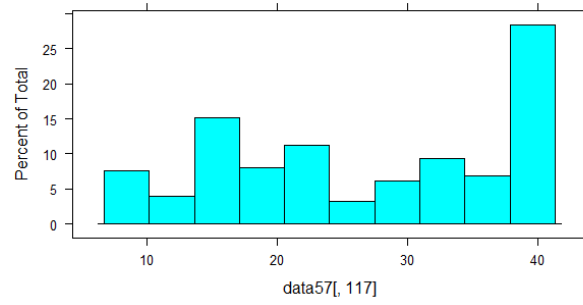

**PROMIS PAIN8 Raw score Norway**

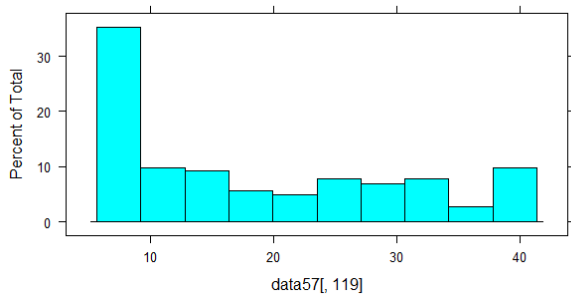

**PROMIS57 PAIN Numeric rating Norway**

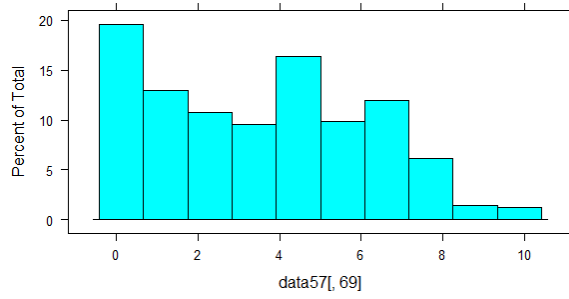

## 4. Supplementary Figure S2 – IRT Item Characteristic plots (ICC)

**Physical function IRT Item characteristic curves**

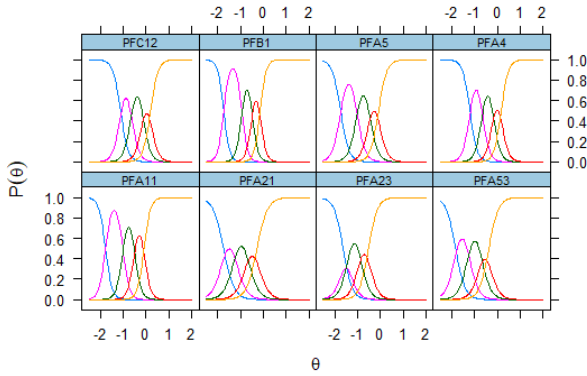

**PROMIS Anxiety 8a IRT trace lines**

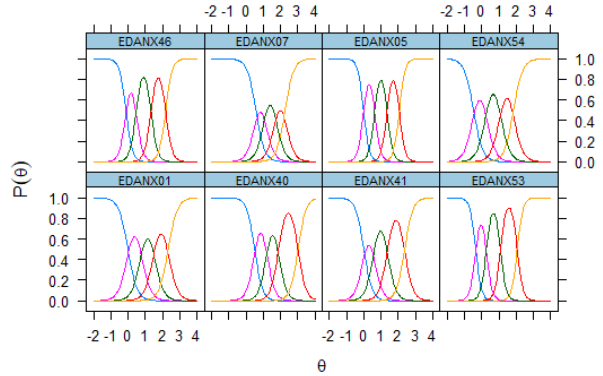

**PROMIS Depression 8b Item trace lines**

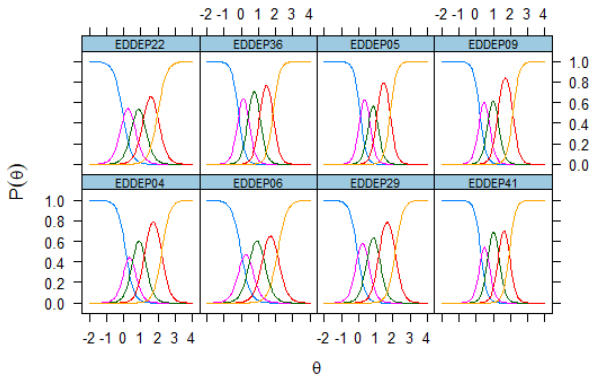

**PROMIS Fatigue 8a IRT trace lines**

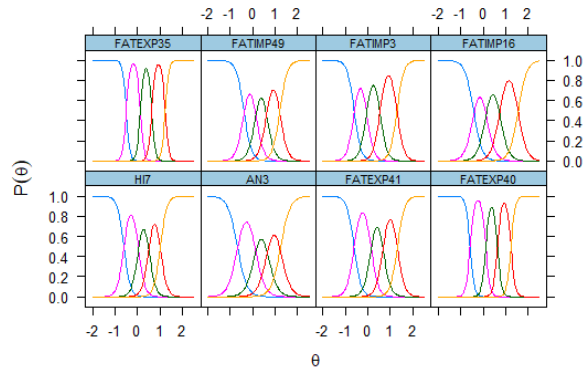

**PROMIS Sleep dist 8b IRT trace lines**

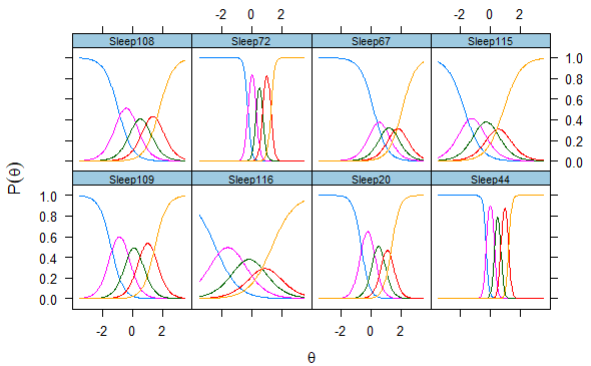

**PROMIS Social R&A ability 8a IRT trace lines**

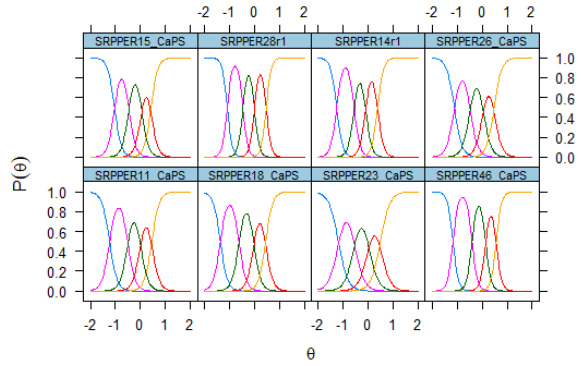

**PROMIS Pain intf 8a IRT trace lines**

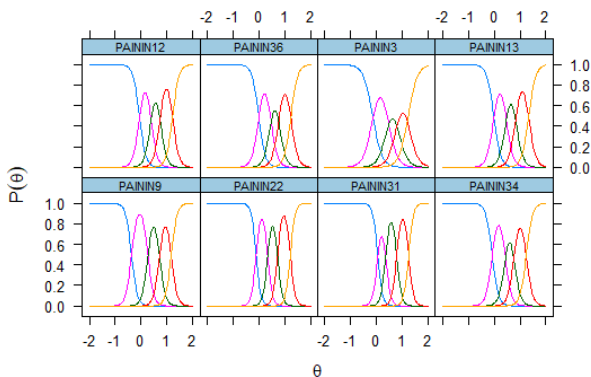

## 5. Supplementary Table S1: IRT parameters for the Norwegian calibrations

| <b>Physical function:</b>                  | Scalability | a1         | d1    | d2    | d3   | d4                | Average difficulty |
|--------------------------------------------|-------------|------------|-------|-------|------|-------------------|--------------------|
| PFA11                                      | .885        | 7.001      | -1.78 | -1.01 | -.51 | -.09              | -0.85              |
| PFA21                                      | .839        | 4.314      | -1.73 | -1.23 | -.69 | -.27              | -0.98              |
| PFA23                                      | .861        | 5.078      | -1.63 | -1.38 | -.89 | -.52              | -1.10              |
| PFA53                                      | .854        | 4.826      | -1.83 | -1.26 | -.72 | -.38              | -1.05              |
| PFC12                                      | .891        | 6.072      | -1.12 | -.64  | -.14 | .20               | -0.43              |
| PFB1                                       | .891        | 7.771      | -1.73 | -.93  | -.49 | -.13              | -0.82              |
| PFA5                                       | .871        | 5.559      | -1.74 | -1.02 | -.47 | -.08              | -0.83              |
| PFA4                                       | .890        | 6.421      | -1.21 | -.66  | -.19 | .16               | -0.47              |
| <b>Overall Scalability / Average Slope</b> | <b>.874</b> | <b>5.9</b> |       |       |      | <b>Avg of avg</b> | <b>-.82</b>        |
| <b>Anxiety:</b>                            | Scalability | a1         | d1    | d2    | d3   | d4                | Average difficulty |
| EDANX01                                    | .814        | 3.76       | -.01  | .77   | 1.50 | 2.33              | 1.15               |
| EDANX40                                    | .841        | 4.393      | .50   | 1.21  | 1.89 | 3.02              | 1.66               |
| EDANX41                                    | .817        | 4.157      | .00   | .58   | 1.37 | 2.37              | 1.08               |
| EDANX53                                    | .872        | 6.053      | -.35  | .27   | 1.09 | 2.06              | 0.77               |
| EDANX46                                    | .848        | 5.347      | -.13  | .47   | 1.33 | 2.18              | 0.96               |
| EDANX07                                    | .826        | 3.975      | .58   | 1.10  | 1.72 | 2.27              | 1.42               |
| EDANX05                                    | .857        | 6.018      | -.02  | .63   | 1.35 | 2.06              | 1.00               |
| EDANX54                                    | .827        | 3.767      | -.47  | .25   | 1.08 | 1.84              | 0.68               |
| <b>Overall Scalability / Average Slope</b> | <b>.838</b> | <b>4.7</b> |       |       |      | <b>Avg of avg</b> | <b>1.09</b>        |
| <b>Depression:</b>                         | Scalability | a1         | d1    | d2    | d3   | d4                | Average difficulty |
| EDDEP04                                    | .816        | 4.239      | .12   | .57   | 1.22 | 2.22              | 1.04               |
| EDDEP06                                    | .807        | 3.737      | .00   | .55   | 1.29 | 2.12              | 0.99               |
| EDDEP29                                    | .813        | 4.456      | -.07  | .52   | 1.19 | 2.13              | 0.94               |
| EDDEP41                                    | .848        | 5.556      | .27   | .70   | 1.31 | 1.93              | 1.05               |
| EDDEP22                                    | .806        | 3.889      | -.06  | .57   | 1.18 | 1.99              | 0.92               |
| EDDEP36                                    | .851        | 5.25       | -.16  | .42   | 1.09 | 1.86              | 0.80               |
| EDDEP05                                    | .841        | 5.594      | .09   | .61   | 1.07 | 1.84              | 0.90               |
| EDDEP09                                    | .838        | 5.446      | .21   | .72   | 1.25 | 2.14              | 1.08               |
| <b>Overall Scalability / Average Slope</b> | <b>.828</b> | <b>4.8</b> |       |       |      | <b>Avg of avg</b> | <b>.97</b>         |
| <b>Fatigue:</b>                            | Scalability | a1         | d1    | d2    | d3   | d4                | Average difficulty |
| HI7                                        | .919        | 7.01       | -.61  | .04   | .51  | 1.02              | 0.24               |
| AN3                                        | .874        | 4.786      | -.68  | .12   | .66  | 1.25              | 0.34               |
| FATEXP41                                   | .897        | 6.331      | -.62  | .14   | .68  | 1.32              | 0.38               |
| FATEXP40                                   | .919        | 1.803      | -.58  | .12   | .64  | 1.24              | 0.35               |
| FATEXP35                                   | .926        | 12.51      | -.50  | .13   | .63  | 1.24              | 0.38               |
| FATIMP49                                   | .899        | 5.987      | -.39  | .14   | .63  | 1.21              | 0.40               |
| FATIMP3                                    | .917        | 6.564      | -.61  | -.06  | .54  | 1.30              | 0.29               |
| FATIMP16                                   | .899        | 5.279      | -.43  | .14   | .74  | 1.56              | 0.50               |
| <b>Overall Scalability / Average Slope</b> | <b>.906</b> | <b>7.4</b> |       |       |      | <b>Avg of avg</b> | <b>.36</b>         |

| <b>Sleep interference:</b>                 | Scalability | a1         | d1     | d2    | d3    | d4                | Average difficulty |
|--------------------------------------------|-------------|------------|--------|-------|-------|-------------------|--------------------|
| Sleep109                                   | .686        | 2.501      | -1.414 | -.311 | .546  | 1.504             | 0.08               |
| Sleep116                                   | .504        | 1.323      | -2.42  | -.781 | .43   | 1.339             | -0.36              |
| Sleep20                                    | .710        | 3.636      | -.655  | .198  | .812  | 1.37              | 0.43               |
| Sleep44                                    | .697        | 1.211      | -.291  | .273  | .693  | 1.222             | 0.47               |
| Sleep108                                   | .625        | 2.132      | -.939  | .122  | .934  | 1.801             | 0.48               |
| Sleep72                                    | .694        | 8.391      | -.262  | .307  | .725  | 1.282             | 0.51               |
| Sleep67                                    | .591        | 2.212      | .175   | .889  | 1.493 | 2.081             | 1.16               |
| Sleep115                                   | .569        | 1.763      | -1.741 | -.745 | .159  | .885              | -0.36              |
| <b>Overall Scalability / Average Slope</b> | <b>.637</b> | <b>4.0</b> |        |       |       | <b>Avg of avg</b> | <b>.30</b>         |
| <b>Social:</b>                             | Scalability | a1         | d1     | d2    | d3    | d4                | Average difficulty |
| SRPPER11_CaPS                              | .910        | 6.622      | -1.24  | -.51  | .00   | .46               | -0.32              |
| SRPPER18_CaPS                              | .919        | 7.017      | -1.36  | -.62  | -.02  | .45               | -0.39              |
| SRPPER23_CaPS                              | .891        | 5.244      | -1.19  | -.55  | .02   | .49               | -0.31              |
| SRPPER46_CaPS                              | .938        | 9.2        | -1.17  | -.40  | .14   | .56               | -0.22              |
| SRPPER15_CaPS                              | .914        | 7.308      | -1.04  | -.46  | .05   | .42               | -0.26              |
| SRPPER28r1                                 | .927        | 1.023      | -1.08  | -.46  | .00   | .48               | -0.27              |
| SRPPER14r1                                 | .930        | 8.302      | -1.27  | -.56  | -.10  | .38               | -0.39              |
| SRPPER26_CaPS                              | .910        | 6.472      | -1.11  | -.48  | .04   | .48               | -0.27              |
| <b>Overall Scalability / Average Slope</b> | <b>.917</b> | <b>7.5</b> |        |       |       | <b>Avg of avg</b> | <b>-.30</b>        |
| <b>Pain interference:</b>                  | Scalability | a1         | d1     | d2    | d3    | d4                | Average difficulty |
| PAININ9                                    | .942        | 8.926      | -.37   | .26   | .72   | 1.17              | 0.45               |
| PAININ22                                   | .937        | 1.84       | -.11   | .35   | .73   | 1.22              | 0.55               |
| PAININ31                                   | .937        | 1.624      | .05    | .36   | .78   | 1.25              | 0.61               |
| PAININ34                                   | .920        | 8.302      | -.08   | .43   | .77   | 1.25              | 0.59               |
| PAININ12                                   | .928        | 8.234      | -.06   | .38   | .74   | 1.22              | 0.57               |
| PAININ36                                   | .924        | 7.732      | .00    | .46   | .78   | 1.25              | 0.62               |
| PAININ3                                    | .900        | 5.576      | -.15   | .44   | .81   | 1.23              | 0.58               |
| PAININ13                                   | .930        | 7.488      | -.02   | .46   | .84   | 1.34              | 0.66               |
| <b>Overall Scalability / Average Slope</b> | <b>.927</b> | <b>8.5</b> |        |       |       | <b>Avg of avg</b> | <b>.58</b>         |

Scalability= coefH from Mokken analysis (R package Mokken) as an expression of monotonicity.

a1 = IRT discrimination (slope) parameter from GRM (R package mirt). d1-d4 = thresholds

|                                                                                                                                                        |                                                                                                                           |
|--------------------------------------------------------------------------------------------------------------------------------------------------------|---------------------------------------------------------------------------------------------------------------------------|
| IRT R-code example (Physical fct=PF):<br>PFgrmodel <- mirt (PFdata57, 1, rep("graded", 8), SE = TRUE)<br>coef(PFgrmodel, IRTpars=TRUE, simplify =TRUE) | Mokken package R code: coefH(PFdata57,se = TRUE,<br>nice.output = TRUE,<br>group.var = NULL, fixed.itemstep.order = NULL) |
|--------------------------------------------------------------------------------------------------------------------------------------------------------|---------------------------------------------------------------------------------------------------------------------------|

## 6. Supplementary Table S2: Alternative IRT model fit indices

Table S2: PROMIS-57, comparing five model fit indices<sup>abcde</sup> for three different IRT models:

Rasch Partial Credit Model (Rasch)/ Graded Response Model(GRM) / Generalized Rating Scale(GRSM), for each of the seven sub-domains, n=408

| Fit indices, thresholds:           |       | PROMIS 57 domains/short forms: |               |               |               |               |               |               |
|------------------------------------|-------|--------------------------------|---------------|---------------|---------------|---------------|---------------|---------------|
|                                    |       | Physical Fct                   | Anxiety       | Depression    | Fatigue       | Sleep         | Social        | Pain          |
| BIC <sup>a</sup><br>(lowest=best)  | Rasch | 5200 /                         | 5352 /        | 5536 /        | 5838 /        | 8057 /        | 5674 /        | 4863 /        |
|                                    | GRM   | 5108 /                         | 5258 /        | 5447 /        | <b>5500</b> / | <b>7731</b> / | 5367 /        | 5220 /        |
|                                    | GRSM  | <b>5068</b>                    | <b>5202</b>   | <b>5350</b>   | 5501          | 7781          | <b>5299</b>   | <b>4824</b>   |
| RMSEA <sup>b</sup><br><.06         | Rasch | .107 /                         | .091 /        | .095 /        | .138 /        | .209 /        | .136 /        | .145 /        |
|                                    | GRM   | .115 /                         | .082 /        | .098 /        | .103 /        | .227 /        | .116 /        | .186 /        |
|                                    | GRSM  | .116                           | .076          | .086          | .106          | 168           | .095          | .138          |
| SRMSR <sup>c</sup><br><.08         | Rasch | .086 /                         | .092 /        | <b>.075</b> / | <b>.012</b> / | .123 /        | .120 /        | .119 /        |
|                                    | GRM   | <b>.027</b> /                  | <b>.025</b> / | <b>.029</b> / | <b>.013</b> / | .081 /        | <b>.013</b> / | <b>.018</b> / |
|                                    | GRSM  | <b>.040</b>                    | <b>.034</b>   | <b>.030</b>   | <b>.025</b>   | .103          | <b>.020</b>   | <b>.027</b>   |
| TLI <sup>d</sup><br>>.95           | Rasch | <b>.098</b> /                  | <b>.099</b> / | <b>.098</b> / | <b>.098</b> / | .877 /        | <b>.978</b> / | <b>.974</b> / |
|                                    | GRM   | <b>.098</b> /                  | <b>.099</b> / | <b>.099</b> / | <b>.099</b> / | .856 /        | <b>.983</b> / | <b>.958</b> / |
|                                    | GRSM  | <b>.097</b>                    | <b>.099</b>   | <b>.099</b>   | <b>.099</b>   | .921          | <b>.989</b>   | <b>.977</b>   |
| CFI <sup>e</sup><br>>.95           | Rasch | <b>.098</b> /                  | <b>.099</b> / | <b>.099</b> / | <b>.098</b> / | .882 /        | <b>.978</b> / | <b>.975</b> / |
|                                    | GRM   | <b>.098</b> /                  | <b>.099</b> / | <b>.099</b> / | <b>.099</b> / | .897 /        | <b>.988</b> / | <b>.970</b> / |
|                                    | GRSM  | <b>.097</b>                    | <b>.099</b>   | <b>.098</b>   | <b>.098</b>   | .884          | <b>.984</b>   | <b>.966</b>   |
| # of criteria met, for each model: | Rasch | 2/                             | 2 /           | 3 /           | 3 /           | 0 /           | 2 /           | 2 /           |
|                                    | GRM   | 3/                             | 3 /           | 3 /           | 4 /           | 1 /           | 3 /           | 3 /           |
|                                    | GRSM  | 4                              | 4             | 4             | 3             | 0             | 4             | 5             |

<sup>a</sup>Bayesian Information Criteria (BIC), <sup>b</sup>Root Mean Square Error of Approximation (RMSEA), <sup>c</sup>Standardized Root Mean Square

Residual (SRMSR), <sup>d</sup>Comparative Fit Index (CFI) <sup>e</sup>Tucker-Lewis Index (TLI). <sup>f</sup>Rasch Partial Credit Model / <sup>g</sup>Graded Response /

<sup>h</sup>Generalized Rating Scale. **Bold values** = criteria (thresholds) are met.

## 7. Supplementary Table S3: Local independence output

**Table S3a: LD index from CFA with WLSMV estimator for PROMIS Sleep Disturbance 8**

|          | Sleep109    | Sleep116    | Sleep20 | Sleep44 | Sleep108 | Sleep72 | Sleep67 | Sleep115 |
|----------|-------------|-------------|---------|---------|----------|---------|---------|----------|
| Sleep109 | .000        |             |         |         |          |         |         |          |
| Sleep116 | <b>.105</b> | .000        |         |         |          |         |         |          |
| Sleep20  | .040        | -.061       | .000    |         |          |         |         |          |
| Sleep44  | -.107       | -.164       | -.035   | .000    |          |         |         |          |
| Sleep108 | .038        | -.016       | .084    | -.105   | .000     |         |         |          |
| Sleep72  | -.121       | -.152       | -.060   | .010    | -.135    | .000    |         |          |
| Sleep67  | -.047       | -.084       | -.007   | .007    | .013     | .039    | .000    |          |
| Sleep115 | .085        | <b>.169</b> | -.006   | -.127   | -.023    | -.124   | -.012   | .000     |

NONE with >.2 in any PROMIS57 domain. Two items >.1 in SLP ( **bold** above), none in the other six domains.

**Table S3b: IRT Residuals as expression of local dependence, output from R LD matrix (lower triangle) and standardized residuals (upper triangle), all PROMIS 57 domains**

Values >.3 are in **bold**:

(fair amount of LD, ref #23, Chen& Thissen 1997)

|       | PFA11   | PFA21   | PFA23   | PFA53   | PFC12  | PFB1   | PFA5   | PFA4  |
|-------|---------|---------|---------|---------|--------|--------|--------|-------|
| PFA11 | NA      | .175    | -.145   | -.135   | -.149  | .261   | .161   | .173  |
| PFA21 | 49.818  | NA      | .192    | .141    | -.095  | -.185  | -.166  | -.169 |
| PFA23 | -34.259 | 6.101   | NA      | .187    | .188   | -.157  | -.170  | -.239 |
| PFA53 | -29.633 | 32.356  | 57.091  | NA      | .156   | -.211  | -.124  | -.151 |
| PFC12 | -36.215 | -14.795 | 57.472  | 39.585  | NA     | .148   | .241   | .140  |
| PFB1  | 11.979  | -55.860 | -4.168  | -72.785 | 35.899 | NA     | .124   | .139  |
| PFA5  | 42.206  | -45.039 | -47.331 | -24.996 | 94.732 | 25.043 | NA     | .128  |
| PFA4  | 48.814  | -46.632 | -92.943 | -37.337 | 31.818 | 31.459 | 26.649 | NA    |

  

|         | EDANX01 | EDANX40 | EDANX41 | EDANX53 | EDANX46 | EDANX07 | EDANX05 | EDANX54 |
|---------|---------|---------|---------|---------|---------|---------|---------|---------|
| EDANX01 | NA      | .101    | -.082   | -.091   | -.118   | .173    | .083    | -.109   |
| EDANX40 | 16.691  | NA      | .083    | -.128   | -.085   | .131    | -.107   | -.105   |
| EDANX41 | -11.021 | 11.237  | NA      | .122    | -.123   | -.096   | -.120   | -.090   |
| EDANX53 | -13.469 | -26.856 | 24.446  | NA      | -.122   | -.106   | -.138   | .093    |
| EDANX46 | -22.777 | -11.801 | -24.544 | -24.381 | NA      | .109    | -.172   | .100    |
| EDANX07 | 48.638  | 27.858  | -14.916 | -18.222 | 19.354  | NA      | .137    | -.119   |
| EDANX05 | 11.264  | -18.860 | -23.444 | -31.300 | -48.464 | 3.618   | NA      | -.152   |
| EDANX54 | -19.529 | -18.138 | -13.240 | 14.071  | 16.428  | -23.098 | -37.769 | NA      |

  

|         | EDDEP04 | EDDEP06 | EDDEP29 | EDDEP41 | EDDEP22 | EDDEP36 | EDDEP05 | EDDEP09 |
|---------|---------|---------|---------|---------|---------|---------|---------|---------|
| EDDEP04 | NA      | .193    | .265    | -.186   | .147    | -.162   | -.252   | -.202   |
| EDDEP06 | 6.801   | NA      | .161    | .095    | .102    | -.137   | -.144   | -.120   |
| EDDEP29 | 114.346 | 42.238  | NA      | .146    | -.152   | .220    | -.099   | .117    |
| EDDEP41 | -56.552 | 14.814  | 34.916  | NA      | .122    | -.081   | -.093   | -.098   |
| EDDEP22 | 35.064  | 17.092  | -37.621 | 24.438  | NA      | .197    | -.159   | -.142   |
| EDDEP36 | -42.939 | -3.669  | 78.947  | -1.580  | 63.180  | NA      | -.227   | .079    |



|         |          |         |         |         |         |         |        |      |
|---------|----------|---------|---------|---------|---------|---------|--------|------|
| EDDEP05 | -104.001 | -33.623 | -16.058 | -14.162 | -41.010 | -83.826 | NA     | .179 |
| EDDEP09 | -66.735  | -23.478 | 22.323  | -15.711 | -33.017 | 1.150   | 52.459 | NA   |

|          | HI7      | AN3         | FATEXP41 | FATEXP40 | FATEXP35 | FATIMP49 | FATIMP3 | FATIMP16    |
|----------|----------|-------------|----------|----------|----------|----------|---------|-------------|
| HI7      | NA       | <b>.383</b> | -.404    | .137     | -.148    | -.120    | .095    | .092        |
| AN3      | 239.607  | NA          | -.708    | -1.061   | -1.134   | -.485    | -.379   | <b>.437</b> |
| FATEXP41 | -266.794 | -818.496    | NA       | .264     | -.123    | -.118    | -.750   | -.221       |
| FATEXP40 | 3.572    | -1837.949   | 113.418  | NA       | .097     | -.181    | -.096   | -.224       |
| FATEXP35 | -35.518  | -2097.128   | -24.688  | 15.421   | NA       | .120     | -.203   | -.215       |
| FATIMP49 | -23.455  | -384.505    | -22.622  | -53.593  | 23.539   | NA       | .123    | .174        |
| FATIMP3  | 14.785   | -234.731    | -919.032 | -14.990  | -67.327  | 24.780   | NA      | .198        |
| FATIMP16 | 13.780   | 312.307     | -79.371  | -81.922  | -75.552  | 49.475   | 64.062  | NA          |

|          | Sleep109 | Sleep116 | Sleep20  | Sleep44  | Sleep108 | Sleep72  | Sleep67  | Sleep115    |
|----------|----------|----------|----------|----------|----------|----------|----------|-------------|
| Sleep109 | NA       | .193     | .234     | -.306    | .210     | -.331    | -.256    | <b>.308</b> |
| Sleep116 | 6.986    | NA       | -.181    | -.207    | .147     | -.172    | -.145    | .253        |
| Sleep20  | 89.415   | -53.172  | NA       | -.159    | .205     | -.215    | -.127    | -.280       |
| Sleep44  | -152.896 | -7.107   | -41.262  | NA       | -.212    | .213     | -.150    | -.468       |
| Sleep108 | 71.837   | 35.261   | 68.308   | -73.194  | NA       | -.223    | -.096    | .299        |
| Sleep72  | -178.555 | -48.376  | -75.268  | 73.987   | -81.242  | NA       | -.131    | -.370       |
| Sleep67  | -106.728 | -34.194  | -26.427  | -36.825  | -15.005  | -27.803  | NA       | -.256       |
| Sleep115 | 155.123  | 104.277  | -128.389 | -357.357 | 145.771  | -223.384 | -107.263 | NA          |

|               | SRPPER1_1_CaPS | SRPPER1_8_CaPS | SRPPER23_CaPS | SRPPER46_CaPS | SRPPER1_5_CaPS | SRPPER2_8r1 | SRPPER_14r1 | SRPPER2_6_CaPS |
|---------------|----------------|----------------|---------------|---------------|----------------|-------------|-------------|----------------|
| SRPPER11_CaPS | NA             | .115           | -.114         | .110          | -.520          | -.122       | -.105       | -.142          |
| SRPPER18_CaPS | 21.719         | NA             | .111          | .111          | -.149          | -.101       | .108        | -.141          |
| SRPPER23_CaPS | -21.385        | 2.054          | NA            | .131          | -.112          | -.117       | -.120       | .131           |
| SRPPER46_CaPS | 19.627         | 2.222          | 27.987        | NA            | .123           | -.099       | -.104       | -.129          |
| SRPPER15_CaPS | -441.035       | -36.393        | -2.625        | 24.533        | NA             | <b>.917</b> | -1.209      | -.138          |
| SRPPER28r1    | -24.376        | -16.637        | -22.429       | -16.027       | 1371.257       | NA          | .123        | -.131          |
| SRPPER14r1    | -18.108        | 19.177         | -23.665       | -17.682       | -2383.801      | 24.779      | NA          | .191           |
| SRPPER26_CaPS | -33.133        | -32.376        | 28.220        | -27.070       | -31.210        | -28.152     | 59.710      | NA             |

|          | PAININ9  | PAININ22 | PAININ31 | PAININ34 | PAININ12 | PAININ36 | PAININ3 | PAININ13 |
|----------|----------|----------|----------|----------|----------|----------|---------|----------|
| PAININ9  | NA       | .116     | .117     | .112     | -.107    | -.255    | -.112   | -.143    |
| PAININ22 | 22.052   | NA       | -.142    | .159     | -.143    | -.173    | -.155   | -.140    |
| PAININ31 | 22.328   | -32.951  | NA       | -.135    | .159     | .106     | -.165   | -.139    |
| PAININ34 | 2.296    | 41.027   | -29.561  | NA       | -.170    | -.148    | -.213   | -.123    |
| PAININ12 | -18.528  | -33.152  | 41.300   | -47.094  | NA       | .151     | .134    | .123     |
| PAININ36 | -106.454 | -49.060  | 18.311   | -35.696  | 37.248   | NA       | .128    | .121     |
| PAININ3  | -2.579   | -39.387  | -44.453  | -73.970  | 29.369   | 26.633   | NA      | .192     |
| PAININ13 | -33.549  | -31.898  | -31.557  | -24.640  | 24.686   | 24.008   | 6.094   | NA       |

## **LD RESULTS for Norwegian PROMIS PROFILE 57**

**Using CFA LD index:** none at  $> .2$  threshold (Reeve 2007)

**Using IRT residuals (Chen&Thissen):** 4 identified item pairs

FATIGUE: 2 pairs, SLEEP DISTURBANCE: 1 pair, SOCIAL ROLES AND ACT: 1 pair  
= in total 4 pairs flagged for having LD  $>.3$ , out of 196 possible = only 2% LD

ItemID (standardized residuals) for the four flagged pairs:

Fatigue: HI7-AN3 (0.383), FATIMP16-AN3 (0.437)

Sleep: Sleep109-Sleep115 (0.325)

Social: SRPPER28r1-SRPPER15\_CaPS (0.917)

**R code example, PF=Physical Fct:**

```
modPF <- mirt(PFdata57, 1, rep("graded", 8), SE = TRUE)
```

```
residuals(modPF, type = 'LD')
```
